# Supplementary material for: Relationship between chemokine receptor expression, chemokine levels and HIV-1 replication in the lungs of persons exposed to Mycobacterium tuberculosis
Source: PubMed Central journal article supplement (PMC3791514; doi:10.1002/eji.201242804), 2012-12-13

Supporting Figure 1: Flow cytometric gating strategy of CCR5 and CXCR4 receptor expression on CD4+ / CD8+ bronchoalveolar lavage mononuclear cells. The gating strategy used to identify CD4+ and CD8+ T-cells from BALMC (A) is shown in representative density plots from a single person. From left to right, lymphocytes were selected using forward scatter/side scatter (FSC/SSC)-area, subsequently followed by by gating on CD3+ T-cells and thereafter selecting CD4+ and CD8+ T-cells. (B) Representative histograms show CCR5 (B,D) and CXCR4 (C,E) expression on CD4+ BALMC (B,C) and CD8+ BALMC (D,E). The grey histograms give one representative example of an HIV-1 uninfected person, the black histograms show one representative example of an HIV-1 infected person. The same strategy was used for phenotyping of PBMC.

## Supporting Figure 1

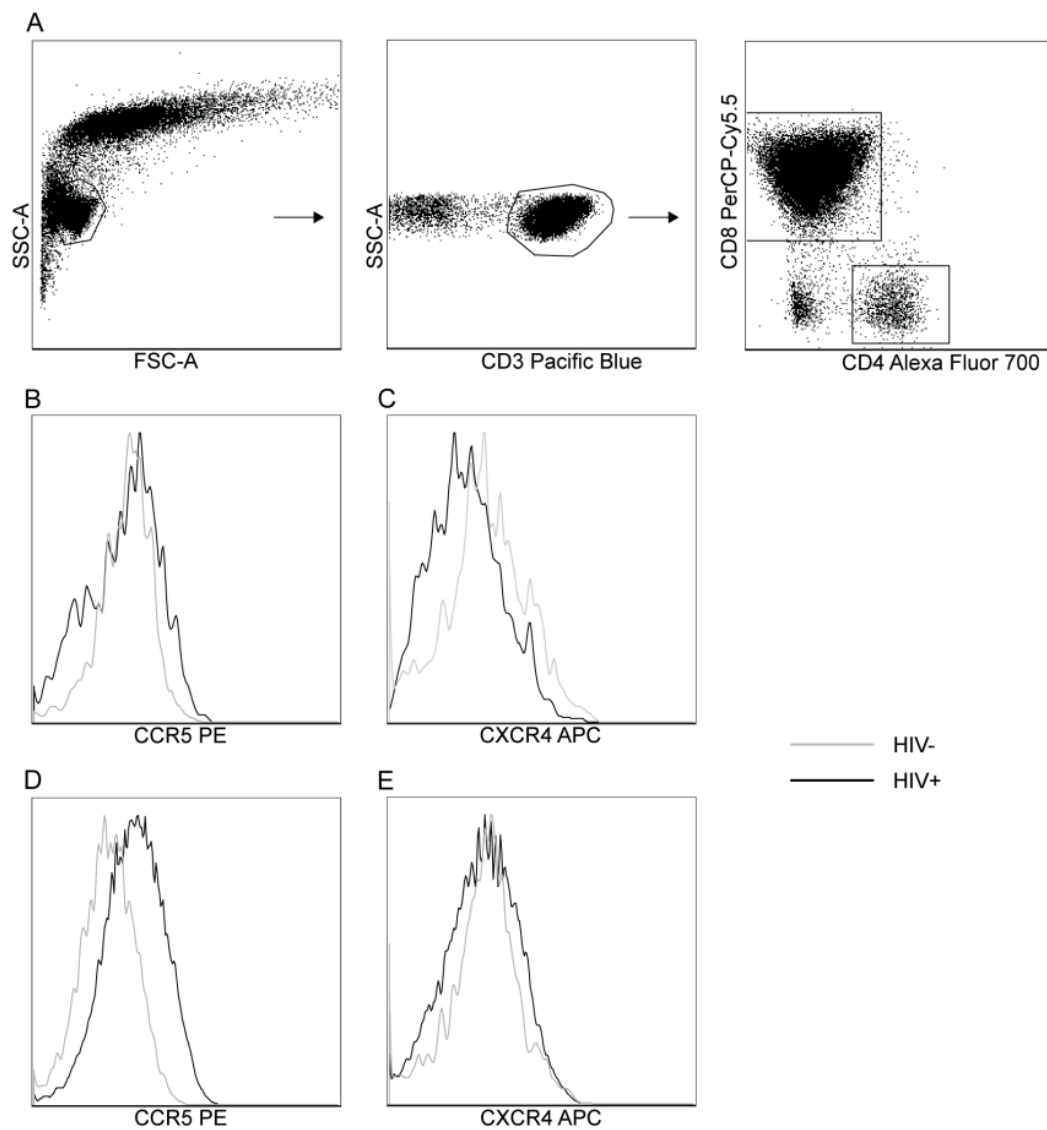

Supplement: NIHMS501171-supplement-01.pdf [file NIHMS501171-supplement-01.pdf]
